# Supplementary material
Source: PubMed Central journal article supplement (PMC4659368)
Supplement: NIHMS737206-supplement-Figure_3.pdf [file NIHMS737206-supplement-Figure_3.pdf]

**Predisposing Conditions**

- Sepsis
- Trauma
- Chemical injury
- Ventilator Induced Lung Injury
- Transfusion Related Lung Injury

**Modifying Factors**

- Low Tidal Volume Ventilation
- Restrictive Transfusion Strategy
- VAP Prevention Bundles

**Pathogenesis**

- Dysregulated Inflammation
- Oxidative Stress
- Coagulation Cascade Dysfunction
- Maladaptive Platelet Activation
- Neutrophil Activation/Chemotaxis

**Proposed Pharmacologic Interventions**

- Aspirin
- Steroids
- Statins
- RAAS Blockage
- N-Acetyl Cysteine
- Mesenchymal Stem Cells
- Keratinocyte Growth Factor
- Adrenomedullin
- Curcumin

- PPAR Agonists
- Beta Agonists
- Heparin/Thrombolytics
- Hypertonic Saline
- Interferon Beta

**ARDS Final Common Pathway**

- Epithelial Barrier Dysfunction
- Endothelial Dysfunction
- Pulmonary Edema
